# Supplementary material for: Communicating the most accurate and reliable science on climate change to society: A survey of editors from the Intergovernmental Panel on Climate Change
Source: Copernicus journal article supplement (doi:10.5194/gc-2024-8), 2024-10-23
Supplement: Supplementary file 1 [file gc-2024-8-supplement.pdf]

| Marca temporal      | - The data collected cor | 1 Your age     | 2 You are |
|---------------------|--------------------------|----------------|-----------|
| 12/24/2023 10:33:34 | Yes                      | 51 to 60 years | female    |
| 12/24/2023 10:36:02 | Yes                      | 71 to 80 years | male      |
| 12/24/2023 10:40:09 | Yes                      | 71 to 80 years | male      |
| 12/24/2023 10:42:57 | Yes                      | 51 to 60 years | male      |
| 12/24/2023 10:47:13 | Yes                      | 51 to 60 years | male      |
| 12/24/2023 10:49:54 | Yes                      | 61 to 70 years | male      |
| 12/24/2023 10:52:56 | Yes                      | 71 to 80 years | male      |
| 12/24/2023 10:57:12 | Yes                      | 51 to 60 years | male      |
| 12/24/2023 10:59:59 | Yes                      | 61 to 70 years | female    |
| 12/24/2023 11:02:26 | Yes                      | 51 to 60 years | female    |
| 12/24/2023 11:04:52 | Yes                      | 71 to 80 years | male      |
| 12/24/2023 11:08:54 | Yes                      | 71 to 80 years | male      |

3 Please choose the or 4 Which one from this

|                      |           |
|----------------------|-----------|
| University           | Alarmed   |
| Retired              | Concerned |
| University           | Alarmed   |
| University           | Alarmed   |
| University           | Concerned |
| University           | Concerned |
| University           | Alarmed   |
| University           | Concerned |
| University           | Concerned |
| University           | Alarmed   |
| University           | Alarmed   |
| IPCC Vice-chair WGII | (Alarmed  |

5 How informed is about climate change is... (1: very poorly informed / 5: v

3

3

4

2

5

4

2

5

3

2

3

1

5 How informed is about climate change is... (1: very poorly informed

3

4

4

4

5

5

2

5

4

3

3

4

5 How informed is about climate change is... (1: very poorly informed / 5: very w

4

5

5

4

5

5

1

5

5

3

5

5

5 How informed is about climate change is... (1: very poorly informed / 5: very well informed)

2

2

2

3

3

3

3

5

3

2

3

2

5 How informed is about climate change is... (1: very poorly informed / 5: very well in

2

2

4

4

5

3

2

4

5

2

2

3

5 How informed is about climate change is... (1: very poorly informed / 5: very well informed)

4

4

5

4

5

4

1

4

5

3

5

5



6 Disinformation or biased information against Climate Change poses a probl

- 5
- 4
- 5
- 2
- 3
- 3
- 5
- 5
- 4
- 5
- 5
- 4

7 IPCC reports tend to be quite technical and extensive, and 7 IPCC reports tend to be quite technical

|   |   |
|---|---|
| 4 | 5 |
| 5 | 4 |
| 5 | 5 |
| 2 | 4 |
| 4 | 2 |
| 5 | 5 |
| 1 | 1 |
| 5 | 5 |
| 2 | 2 |
| 5 | 4 |
| 5 | 5 |
| 3 | 5 |

7 IPCC reports tend to be quite technical ar

5

5

5

5

5

3

1

5

5

5

5

5

7 IPCC reports tend to be quite technical and extensive, and not always 7b Other features that c

3

5

5

5

1

2

1

5

5

5

4

1

8 The synthesis report that is approved by the government 8 The synthesis report that is approved by the government

4

4

3

4

5

5

5

4

3

5

4

2

5

5

5

4

3

5

4

5

5

5

5

5

8 The synthesis report : 8 The synthesis report : 9 The fact that the IPCC reports are the r

|   |   |   |
|---|---|---|
| 4 | 3 | 2 |
| 4 | 4 | 4 |
| 5 | 5 | 2 |
| 4 | 3 | 4 |
| 5 | 3 | 1 |
| 4 | 3 | 2 |
| 5 | 4 | 2 |
| 4 | 5 | 5 |
| 4 | 4 | 4 |
| 4 | 4 | 3 |
| 4 | 5 | 2 |
| 5 | 2 | 5 |

9 The fact that the IPC 9 The fact that the IPC 9 The fact that the IPCC reports are t

|   |   |   |
|---|---|---|
| 4 | 3 | 2 |
| 2 | 2 | 2 |
| 4 | 2 | 2 |
| 3 | 2 | 2 |
| 1 | 1 | 1 |
| 3 | 2 | 2 |
| 4 | 2 | 2 |
| 5 | 5 | 5 |
| 5 | 4 | 3 |
| 3 | 3 | 3 |
| 2 | 1 | 1 |
| 3 | 5 | 5 |

10 Which actions do you consid 10 Which actions do you consider 10 Which actions do you

|   |   |   |
|---|---|---|
| 4 | 2 | 2 |
| 2 | 4 | 2 |
| 4 | 5 | 1 |
| 5 | 4 | 5 |
| 3 | 5 | 1 |
| 4 | 1 | 1 |
| 5 | 4 | 2 |
| 5 | 4 | 5 |
| 5 | 5 | 3 |
| 5 | 2 | 1 |
| 5 | 4 | 1 |
| 3 | 3 | 3 |



10 Which actions do you c 10 Which actions do you consider 10 Which actions do you consid

|   |   |   |
|---|---|---|
| 4 | 4 | 4 |
| 5 | 3 | 5 |
| 5 | 5 | 5 |
| 5 | 5 | 1 |
| 5 | 3 | 3 |
| 4 | 4 | 2 |
| 4 | 5 | 5 |
| 5 | 5 | 5 |
| 5 | 5 | 5 |
| 4 | 4 | 3 |
| 4 | 5 | 5 |
| 5 | 3 | 3 |

10b Other actions to co 11 What is the best way to communicate 11 What is the best way to commu

|   |   |
|---|---|
| 5 | 4 |
| 5 | 4 |
| 5 | 4 |
| 4 | 3 |
| 5 | 3 |
| 2 | 2 |
| 5 | 4 |
| 5 | 5 |
| 5 | 5 |
| 4 | 4 |
| 4 | 4 |
| 5 | 5 |

11 What is the best way to commi 11 What is the best way to i 11 What is the best way to cor

|   |   |   |
|---|---|---|
| 5 | 5 | 4 |
| 4 | 4 | 5 |
| 5 | 4 | 5 |
| 5 | 5 | 4 |
| 5 | 5 | 3 |
| 2 | 3 | 4 |
| 5 | 5 | 5 |
| 5 | 5 | 5 |
| 5 | 5 | 4 |
| 5 | 5 | 4 |
| 4 | 4 | 5 |
| 5 | 5 | 5 |

11 What is the best way to c 11 What is the best way 11 What is the best way to con

|   |   |   |
|---|---|---|
| 4 | 4 | 5 |
| 5 | 4 | 5 |
| 5 | 5 | 5 |
| 4 | 5 | 4 |
| 4 | 4 | 4 |
| 4 | 4 | 4 |
| 5 | 5 | 5 |
| 5 | 5 | 5 |
| 4 | 4 | 4 |
| 4 | 4 | 5 |
| 5 | 5 | 5 |
| 5 | 5 | 5 |

| 11 What is the best way to c | 11 What is the best wa | 12 The main problem c | 12 The main problem c |
|------------------------------|------------------------|-----------------------|-----------------------|
| 3                            | 3                      | 4                     | 2                     |
| 5                            | 4                      | 5                     | 4                     |
| 5                            | 3                      | 2                     | 2                     |
| 4                            | 5                      | 4                     | 4                     |
| 3                            | 4                      | 2                     | 2                     |
| 4                            | 4                      | 4                     | 4                     |
| 4                            | 4                      | 2                     | 2                     |
| 5                            | 5                      | 5                     | 5                     |
| 5                            | 1                      | 3                     | 3                     |
| 3                            | 3                      | 4                     | 3                     |
| 4                            | 3                      | 3                     | 2                     |
| 5                            | 3                      | 1                     | 1                     |

12 The main problem of Climate Change communication is

|   |   |   |
|---|---|---|
| 4 | 3 | 5 |
| 5 | 5 | 3 |
| 4 | 1 | 5 |
| 5 | 4 | 2 |
| 4 | 3 | 1 |
| 4 | 3 | 3 |
| 4 | 5 | 5 |
| 5 | 5 | 5 |
| 5 | 5 | 4 |
| 4 | 4 | 4 |
| 4 | 4 | 5 |
| 2 | 3 | 5 |

13 As a scientist, what If you want to receive the results of the questionnaire, please write your

- 1
- 2
- 3
- 4
- 5
- 6
- 7
- 8
- 9
- 10
- 11
- 12

r email
