# Supplementary material for: Communicating the most accurate and reliable science on climate change to society: A survey of editors from the Intergovernmental Panel on Climate Change
Source: Copernicus journal article supplement (doi:10.5194/gc-2024-8), 2024-10-23
Supplement: Supplementary file [file gc-2024-8-AC2-supplement.pdf]

## **IPCC QUESTIONNAIRE**

Objective: To know the opinion of IPCC Synthesis Report Chairs & Vice-chairs, on aspects related to the communication of climate change to society.

This is a research that is part of a doctoral thesis

Approximate completion time: 10 minutes.

Thank you very much for your collaboration

Tomas Molina

University of Barcelona

- The data collected complies with the European "General Data Protection Regulation" and will be used exclusively for research purposes.

**You authorize your answers to be used for a scientific article**

Yes

No

### **A Personal information**

#### **1 Your age \***

less than 30 years

31 to 40 years

41 to 50 years

51 to 60 years

61 to 70 years

71 to 80 years

more than 81 years

#### **2 You are \***

male

female

prefer not to say

#### **3 Please choose the one that better fits your principal current professional situation \***

University

Government

Private sector

Public sector

Retired

Other...

### **B On the state of knowledge about Climate Change**

**4 Which one from this list, better describes your feeling about the Climate Change \***

Alarmed  
Concerned  
Cautious  
Disengaged  
Doubtful  
Dismissive

**5 How informed is about climate change...\***

(1: very poorly informed / 5: very well informed)

the Society of your Country  
the government of your country  
the scientific community of your country  
the world society as a whole  
the world's governmental rulers  
the scientific community as a whole

**6 Disinformation or biased information against Climate Change poses a problem ... \***

(Rate from 1 Not important at all and 4 very important)

**C On the IPCC reports**

**7 IPCC reports tend to be quite technical and extensive, and not always easy to understand. What are the features that can facilitate comprehension to people outside the field of science, or with less training? \***

( 1: strongly disagree / 5: strongly agree )

They must be written in language that is as much understandable as possible  
They must concentrate on embodying scientific knowledge on each subject  
They must include resources such as graphs or tables to facilitate understanding.  
They must contain a summary expressed in journalistic language so that they can be understood by the general public

**7b Other features that can facilitate comprehension to people outside the field of science, or with less training.**

...

**8 The synthesis report that is approved by the government representatives is perhaps the report with the most informative relevance and that generates the most media attention. \***

(1: strongly disagree / 5: strongly agree)

The synthesis report reflects the content of the corresponding full report  
The approval procedure maintains the perception of the scientific objectivity of knowledge  
From reading the synthesis report, you can get an adequate general knowledge of the situation  
The interpretation that comes to society about this report is appropriate

## **D On the importance of communication in the IPCC**

### **9 The fact that the IPCC reports are the main scientific reference on Climate Change.... \***

(1: strongly disagree / 5: strongly agree)

means that there are limitations in the communication of scientific outcomes to the general public.

forces to maintain the original text of the reports in all communications.

limits the possibilities of making headlines.

limits the possibility of creating simplified texts for the majority of audiences.

### **10 Which actions do you consider most appropriate (effective) to communicate the contents of the IPCC reports to the general public \***

(1: least effective / 5: most effective)

Give examples from everyday life

Stick to the original text of the reports

Make headlines that frighten the public

Use graphics and illustrations

Extract messages that lead to action

The fight against scientific misinformation

### **10b Other actions to communicate IPCC contents**

...

### **11 What is the best way to communicate the contents of the IPCC to the general public? \***

(1: strongly disagree / 5: strongly agree)

Publish the complete IPCC reports on the Web

Open access of all research publications on Climate Change

Try to make the IPCC reports part of the training of university students

Ensure that the core messages of the IPCC reports become part of the schooling curriculum

Written press information

Information on televisions

Information on the radio

Diffusion on social networks

Conferences of scientists

Sermon of spiritual and religious leaders

**12 The main problem of Climate Change communication is...\***

(1: strongly disagree / 5: strongly agree)

the scientific complexity of the subject.

the uncertainty in the scientific statements.

the social and economic complexity in decision-making.

the political controversy.

the self-interested misinformation.

**13 As a scientist, what would you emphasise about communicating the science of Climate Change to the general population**

**E Results**

If you want to receive the results of the questionnaire, please write your email
