# Supplementary material for: Communicating the most accurate and reliable science on climate change to society: A survey of editors from the Intergovernmental Panel on Climate Change
Source: Copernicus journal article supplement (doi:10.5194/gc-2024-8), 2024-10-23
Supplement: Supplementary file [file gc-2024-8-AC4-supplement.pdf]

REPLY 2 RC1

Hi,

Thank you for addressing my comments so thoroughly!

There is only one point that I would like to reiterate – I think data on which country IPCC authors are from would be helpful. The questionnaire specifically asks IPCC authors about the scientific community/government in their country, e.g. in Figure 2, so I think this information would be useful.

I know that that the IPCC tries to achieve a global balance in their authors, but analysis shows that this has not been achieved. E.g.

<https://www.carbonbrief.org/analysis-how-the-diversity-of-ipcc-authors-has-changed-over-three-decades/>.

Even if you did not ask IPCC authors for their nationality for the survey, it is possible to find which country IPCC scientists are based in here

<https://archive.ipcc.ch/report/ar5/authors.php>

Many thanks for your kind suggestion that helps us to improve our paper. We have added results about nationality from those respondents who identified themselves at the survey. The text is as follows:

Out of all respondents, six chose to identify themselves to receive the survey results. Four were from Europe (the UK, France, the Netherlands, and Switzerland), while two were from Africa, both hailing from Ethiopia but affiliated with different IPCC cycles.

Of course, this is just a suggestion. But I feel that it would be a useful addition to your study.
