# Supplementary material for: Communicating the most accurate and reliable science on climate change to society: A survey of editors from the Intergovernmental Panel on Climate Change
Source: Copernicus journal article supplement (doi:10.5194/gc-2024-8), 2024-10-23
Supplement: Supplementary file [file gc-2024-8-AC5-supplement.pdf]

1 **Communicating the most accurate and reliable science on**  
2 **climate change to society: A survey of editors from the**  
3 **Intergovernmental Panel on Climate Change**

4 Tomas Molina<sup>1</sup>& Ernest Abadal<sup>2</sup>

5 <sup>1</sup>Applied Physics, Universitat de Barcelona

6 <sup>2</sup> Ernest Abadal, Universitat de Barcelona

7 Correspondence to: Tomas Molina ([tomasmolina@ub.edu](mailto:tomasmolina@ub.edu))

8

9 **Abstract.** This study focuses on the perspectives of scientists involved in the IPCC AR5 and AR6 synthesis  
10 reports, examining their views on the communication of climate change knowledge and its dissemination to the  
11 public. The objectives include understanding scientists' opinions on the state of climate change knowledge, the  
12 effectiveness of current communication strategies, and recommendations for improving public engagement. A  
13 survey was conducted among 72 IPCC scientists, assessing their perceptions on various aspects of climate  
14 communication, including the use of media, educational integration, and challenges like misinformation. Results  
15 show that scientists generally rate the scientific community as well-informed, policymakers as moderately  
16 informed, and the public as only acceptably informed about climate change. Many respondents suggested  
17 improvements in the clarity and accessibility of IPCC reports, emphasizing the role of media, social networks,  
18 and education in better informing the public. The study concludes that trust in information sources is vital for  
19 effective climate communication and that a more tailored, empathetic, and solutions-based approach is  
20 necessary to bridge the gap between scientific knowledge and public understanding.

21 Keywords: communication, climate, IPCC, survey, public

22

23 **1 Introduction**

24

25 The challenge posed by climate change to society is immense. The overwhelming evidence that human reliance  
26 on fossil fuels has led to atmospheric warming, which in turn is altering weather patterns and the global climate,  
27 highlights the need for widespread social awareness on a global scale. Few times in human history has there  
28 been such an urgent need for a shared global consensus among all inhabitants of the planet (Somerville &  
29 Hassol, 2011). Addressing and adapting to climate change requires not only agreement on a transition to new  
30 energy paradigms but also discussions on the future of economic growth, or even potential degrowth (Hansen et  
31 al., 2008; Howes et al., 2013). This consensus must be grounded in scientific knowledge, its credibility, and the  
32 broad agreement within the scientific community (Buttel et al., 1990; Change, 2011; Fuhrer et al., n.d.).

33

34 The losses and damage already being caused by climate change, as well as those anticipated in the future,  
35 highlight the fact that there will inevitably be both winners and losers in this global crisis. This reality extends

Código de campo cambiado

36 the discussion beyond the realm of science, touching on ethics, politics, ecology, sociology, and even religion  
37 (Francisco, 2015). Addressing these multifaceted impacts requires an interdisciplinary approach that recognizes  
38 the complex and far-reaching consequences of climate change on all aspects of society (Molina & Abadal,  
39 2024).

40

41 In this highly complex context, science is expected to play a critical role in guiding decision-making and  
42 shaping a unified global strategy for humanity's adaptation to these changes (Cutter et al., 2012). The  
43 Intergovernmental Panel on Climate Change (IPCC) has emerged as the leading authority on expert knowledge  
44 related to climate change. However, it is not without controversy (De Pryck, 2018). The influence of its  
45 scientific reports on national and global policies often blurs the line between politics and epistemology, creating  
46 tensions around the intersection of science and policy (Beck, 2012; Hermansen et al., 2021).

47

48 From its first report in 1990 to its sixth in 2023, the IPCC's level of certainty in its findings has steadily  
49 increased. As a result, the urgency for action among decision-makers and society at large has intensified, giving  
50 rise to terms like "climate emergency" and global agreements such as the Paris Agreement. The latter aims to  
51 limit emissions and keep global temperature rise well below 2°C compared to pre-industrial levels (Höhne et al.,  
52 2021; Molina & Abadal, 2021; Ripple et al., 2022).

53

54 The scientific foundation of the IPCC reports is derived from research published in peer-reviewed scientific  
55 journals, which undergoes rigorous scrutiny by independent experts. Only knowledge that passes this  
56 demanding review process is included in these reports. However, determining which findings are ultimately  
57 incorporated into the reports that inform policymakers is itself a subject of analysis, attention, and, at times,  
58 controversy (Beck & Mahony, 2018a).

59

60 Ultimately, the knowledge and strategies for mitigation and adaptation outlined in the IPCC reports are handed  
61 over to policymakers, whose decisions impact society at large. The global strategy to combat and adapt to  
62 climate change targets individuals across all social, cultural, and religious backgrounds, as well as those from  
63 diverse economic and educational levels. The public's perception of the urgency, as well as the mitigation and  
64 adaptation strategies outlined in the IPCC reports, extends beyond policymakers (Gemedu et al., 2023). These  
65 reports form a key part of the information that reaches global society, which must ultimately support the  
66 decisions made by political leaders. The popularization of the IPCC's findings—making complex scientific and  
67 technical information accessible to the general public—requires an effective communication strategy. This  
68 strategy should ensure that people of all knowledge levels can understand and engage with the content (Doran et  
69 al., 2023; Rödder & Pavenstädt, 2023).

70

71 **2 Objectives**

72

73 Our study group consists of scientists who were part of the writing teams for the IPCC5 and IPCC6 synthesis  
74 reports. We are interested in their perspectives on the communication aspects of current climate change  
75 knowledge, as well as their views on how effectively this information is being conveyed to the public.

76 The specific objectives are as follows:

- 77 1. To understand the perspectives of IPCC scientists on the current state of climate change and their role  
78 in efforts to reduce and mitigate its impacts.
- 79 2. To gather opinions from IPCC scientists on how best to communicate the scientific content of IPCC  
80 reports to the public.
- 81 3. To collect proposals from IPCC scientists on how to improve the dissemination of this scientific  
82 information to society at large.

83 The scientific knowledge about climate change that reaches society must be both up-to-date and supported by  
84 the broadest possible consensus within the scientific community. Additionally, this knowledge should be  
85 presented in a way that is not only rational and easy to understand but also resonates with people on emotional  
86 and spiritual levels across different cultures (Bolisani & Bratianu, 2018).

### 87 **3 Methodology**

88

89 The IPCC reports are published approximately every seven years, which can make it challenging to stay in  
90 contact with the scientists who contributed to them. For this reason, we have focused our study on the two most  
91 recent reports: IPCC AR6 and IPCC AR5. Our sample includes members of the Scientific Steering Committee  
92 for the IPCC AR6 synthesis report (IPCC, n.d.), as well as the Chairs and Vice-Chairs of the IPCC AR5  
93 synthesis report.

94

95 The fifth IPCC report was published in 2014, nine years before we launched our survey. As a result, some of the  
96 scientists involved were no longer reachable at their original contact addresses. To address this, we searched  
97 research publication databases for up-to-date contact information for both the IPCC AR5 and AR6 synthesis  
98 report writing teams. After accounting for deceased individuals, we obtained a final sample of 28 contacts from  
99 the IPCC AR6 and 44 from the IPCC AR5, resulting in a total of 72 contacts across the two reports.

100 The survey was structured into four sections: general information about the scientists, their perception of the  
101 current level of knowledge on climate change, their views on the IPCC reports, and opinions on the  
102 communication of these reports to society. We used closed-ended questions with a Likert scale, along with  
103 open-ended options for questions related to communication.

104 The survey questions were reviewed by a scientist who contributed to both the IPCC AR6 and AR5 reports.

105 To rate the responses on the Likert scale, we assigned numerical values to each option, with 1 representing the  
106 lowest value and 5 representing the highest. We then averaged the responses for each question or survey section.

107 The resulting average reflects the respondents' positions based on the following scale: 1 = very low, 2 = low, 3 =  
108 neither high nor low, 4 = high, 5 = very high.  
109 To enhance the clarity of the results, we multiplied the average by two, converting the values to a scale of 1 to  
110 10. The results were then classified using standard educational labels: "Very poor / F" from 0 to 2,9  
111 "Insufficient / E" from 3 to 4,9  
112 "Sufficient / D" from 5 to 5,9  
113 "Good / C" from 6 to 6,9  
114 "Notable / B" from 7 to 8,9  
115 "Excellent / A" from 9 to 10  
116

117 The survey was distributed via email using a Google Forms format, with English as the language of  
118 communication. It was initially sent out in February 2023, coinciding with the approval phase of the IPCC's  
119 Sixth Assessment Report, which took place at the 58th panel session in Interlaken, Switzerland, in March of the  
120 same year. A reminder was sent in April, after the approval process had been completed.  
121

#### 122 **4 Results and discussion**

123

124 The scientists who responded to the survey (figure 1) were aged 51 and older, with a significant portion (58.4%)  
125 over 61. Although only one respondent explicitly identified as retired, the CVs of those who provided their  
126 details indicate that some hold emeritus professor positions at their respective universities. The majority of  
127 respondents were men (75%) and from academic institutions (83.3%). The representation of women, at 25% of  
128 responses, aligns with the published gender demographics of IPCC report authors (Liverman et al., 2022). The  
129 age distribution of our respondents is also consistent with findings from other studies on IPCC authors (Gay-  
130 Antaki, 2021).

131 Out of all respondents, six chose to identify themselves to receive the survey results. Four were from Europe  
132 (the UK, France, the Netherlands, and Switzerland), while two were from Africa, both hailing from Ethiopia but  
133 affiliated with different IPCC cycles.

**Con formato:** Lletra per defecte del paràgraf, Fuente: (Predeterminada) Times New Roman, 10 pto, Color de fuente: Negro

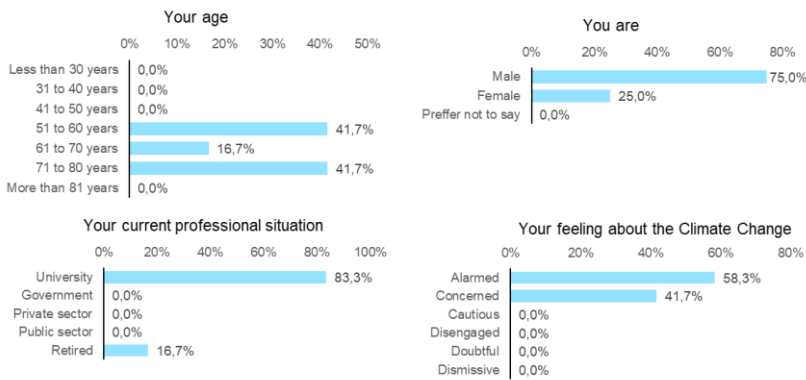

134

135 *Figure 1. Age, Gender, Profession & Feelings about Climate Change*

136

137 The majority of participants feel alarmed (58,3%) or worried (41,7%) about climate change. Those with a  
 138 deeper understanding of the current climate situation tend to view its potential future with greater concern and  
 139 alarm. [This aligns with the evolution of the "Global Warming's Six Americas" framework, which illustrates a](#)  
 140 [growing concern about climate change and a shift in public attitudes over time \(Leiserowitz et al., 2021\).](#)

141 Responses indicate that participants (figure 2) view the scientific community as highly informed about climate  
 142 change (rated 8,7) while they consider policymakers only moderately informed (rated between 6,3 (world) and  
 143 7,7 (local)). In contrast, the general public is seen as being only "acceptably" informed (rated between 6,2  
 144 (local) and 5,5 (world)). Participants also identified misinformation and biased, self-interested information as  
 145 notable issues (rated 8,3) [The literature on climate change communication highlights several key points:](#)  
 146 [explaining its causes enhances science acceptance, emphasizing scientific consensus counters misinformation,](#)  
 147 [culturally aligned messaging is more effective, and inoculating against misinformation works best, though](#)  
 148 [debunking can also be successful.](#)

**Eliminado:** This aligns with the evolution of the "Global Warming's Six Americas" framework, which illustrates a growing concern about climate change and a shift in public attitudes over time (Leiserowitz et al., 2021).

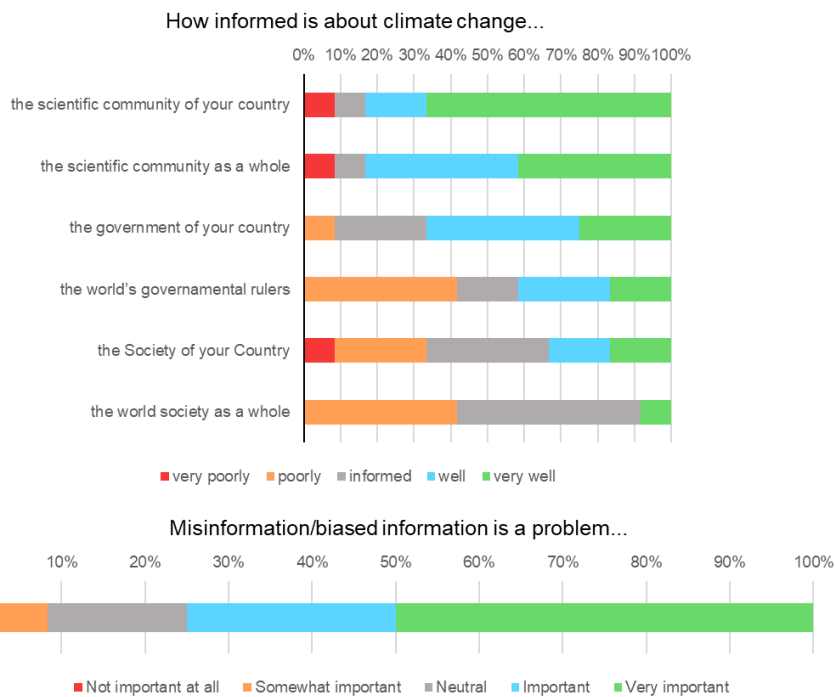

**Eliminado:** The literature on climate change communication highlights several key points: explaining its causes enhances science acceptance, emphasizing scientific consensus counters misinformation, culturally aligned messaging is more effective, and inoculating against misinformation works best, though debunking can also be successful. ¶

153

154 *Figure 2. Information Status, and Biased information*

155

156 Regarding the IPCC reports (figure 3), the majority of participants believe they demonstrate notable scientific  
 157 objectivity (rated 8,8) and reflect the best available knowledge on climate change (rated 7,8). While respondents  
 158 feel that the reports have a notable impact on society as a whole (rated 7,5), opinions vary more widely in this  
 159 area.

160 The use of graphs and tables to enhance comprehension is highly appreciated (rated 9), as these visual aids make  
 161 the reports more understandable (Harold et al., 2020). Many respondents see the primary role of the IPCC  
 162 reports as providing the best possible information to decision-makers, rather than directly to the general public.  
 163 They believe that the public often accesses these reports through other interpretive channels, as expressed in  
 164 open-ended responses.

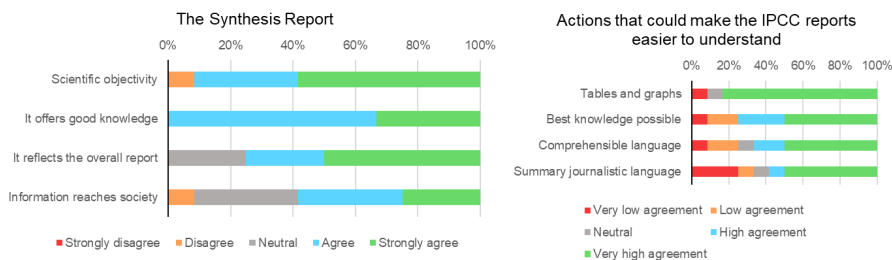

171

172 *Figure 3. About Summary Reports & Understanding of Reports*

173

174 [Many respondents suggested the possibility of creating a more concise version of the IPCC summary report](#)  
 175 [specifically for the general public. Our survey findings align with the discussions and recommendations from](#)  
 176 [the IPCC's February 2016 Expert Meeting on Communications and their ongoing implementation. The goal is](#)  
 177 [to deepen understanding of the IPCC's communication efforts within the broader context of climate](#)  
 178 [communication and policy. This may also inspire further ideas on how to strengthen the IPCC's communication](#)  
 179 [strategies \(Lynn, 2018\).](#)

180 [When discussing how to communicate the contents of IPCC reports to the public, the majority \(rated 9.2\)](#)  
 181 [believe it is appropriate for these reports to be integrated into university curricula and school education \(rated](#)  
 182 [9.2\). The strong agreement among our survey respondents aligns with literature indicating that university](#)  
 183 [students believe climate change is real and primarily human-induced, with the majority expressing concern.](#)  
 184 [However, the studies also reveal misconceptions about the fundamental causes and consequences of climate](#)  
 185 [change \(Wachholz et al., 2014\).](#)

186 [Respondents also emphasized the importance of making the reports fully accessible to everyone via the internet](#)  
 187 [\(rated 9\). Social networks \(rated 9.3\), along with media outlets like television \(rated 9\) and radio \(rated 9\), were](#)  
 188 [seen as the most suitable platforms for informing the public. The written press was rated slightly lower \(rated](#)  
 189 [8.8\), but still viewed as an important channel. Overall, respondents rated highly the effectiveness of these](#)  
 190 [channels for informing the population. The use of new media aligns with studies suggesting that non-elite](#)  
 191 [actors, such as individual bloggers and concerned citizens, are effective climate change advocates. While](#)  
 192 [mainstream media remains the most frequently discussed, new media and science information sources are strong](#)  
 193 [competitors for audience attention \(Newman, 2017\).](#)

194 [It is worth noting that some respondents expressed dissenting opinions on the use of journalistic language,](#)  
 195 [political debates, and religious or spiritual sermons in the communication of these reports. The simplification of](#)  
 196 [scientific information often risks undermining its credibility, largely due to a failure to recognize the tensions](#)  
 197 [between scientific and public interpretations. Maintaining scientific credibility requires balancing it with](#)  
 198 [meaningful social and political dialogue about the values we hold and the actions we take to protect them.](#)

**Eliminado:** Many respondents suggested the possibility of creating a more concise version of the IPCC summary report specifically for the general public. Our survey findings align with the discussions and recommendations from the IPCC's February 2016 Expert Meeting on Communications and their ongoing implementation. The goal is to deepen understanding of the IPCC's communication efforts within the broader context of climate communication and policy. This may also inspire further ideas on how to strengthen the IPCC's communication strategies (Lynn, 2018).¶  
 When discussing how to communicate the contents of IPCC reports to the public, the majority (rated 9.2) believe it is appropriate for these reports to be integrated into university curricula and school education (rated 9.2). The strong agreement among our survey respondents aligns with literature indicating that university students believe climate change is real and primarily human-induced, with the majority expressing concern. However, the studies also reveal misconceptions about the fundamental causes and consequences of climate change (Wachholz et al., 2014). ¶  
 Respondents also emphasized the importance of making the reports fully accessible to everyone via the internet (rated 9). Social networks (rated 9.3), along with media outlets like television (rated 9) and radio (rated 9), were seen as the most suitable platforms for informing the public. The written press was rated slightly lower (rated 8.8), but still viewed as an important channel. Overall, respondents rated highly the effectiveness of these channels for informing the population. The use of new media aligns with studies suggesting that non-elite actors, such as individual bloggers and concerned citizens, are effective climate change advocates. While mainstream media remains the most frequently discussed, new media and science information sources are strong competitors for audience attention (Newman, 2017).¶

233 Strengthening the link between the theory and practice of climate science communication is essential (Hollin &  
 234 Pearce, 2015; Pidcock et al., 2021).

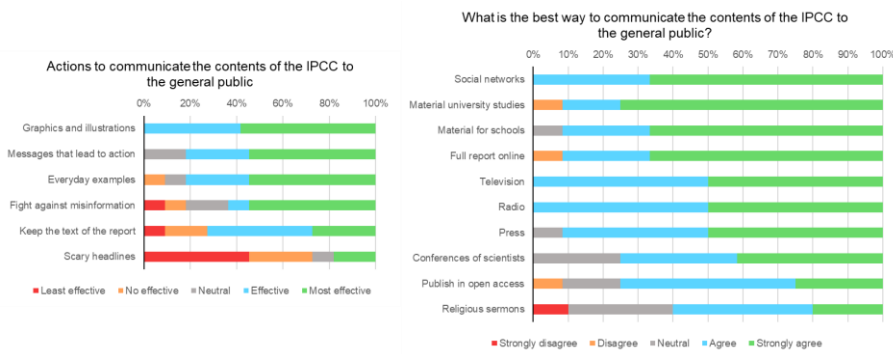

235

236 *Figure 4. Public Communication and Channels*

237

238 Misinformation is widely seen as a significant problem (rated 7,8). This issue was raised three times throughout  
 239 the survey (Sanford et al., 2021), and in both instances where respondents were asked whether misinformation  
 240 was a concern, the responses were remarkably consistent. There was even stronger agreement on the need to  
 241 actively combat misinformation (Lewandowsky, 2021).

242 According to respondents, the biggest challenge in communicating climate change is not the difficulty of  
 243 understanding its scientific aspects (rated 6.5), nor simply the need to convey clear and relevant information to  
 244 users (Adler & Hirsch Hadorn, 2014). Instead, the primary challenge lies in the complexity of decision-making  
 245 within social and economic contexts (rated 8.3). As highlighted in the literature, this complexity reflects an  
 246 evolving relationship between climate science and policy, which is undergoing a significant transformation  
 247 (Beck & Mahony, 2018b).

248 Additionally, the vast majority of participants provided comments and suggestions in the open-ended questions.  
 249 Among the most commonly suggested solutions were:

- 250 • Short, simple, and easy-to-understand messages, that may help in making IPCC a power  
 251 communicating tool (Stocker & Plattner, 2016).
- 252 • Demonstrating empathy towards individuals and communities by linking climate change to everyday  
 253 life and focusing on the future of new generations, while staying true to the content of the reports  
 254 (McBeth et al., 2022).

255 One notable response from Ethiopia highlighted the need to improve the training of those responsible for  
 256 informing the public about climate change.

**Eliminado:** According to respondents, the biggest challenge in communicating climate change is not the difficulty of understanding its scientific aspects (rated 6,5), nor simply the need to convey clear and relevant information to users (Adler & Hirsch Hadorn, 2014). Instead, the primary challenge lies in the complexity of decision-making within social and economic contexts (rated 8,3). As highlighted in the literature, this complexity reflects an evolving relationship between climate science and policy, which is undergoing a significant transformation (Beck & Mahony, 2018b).¶



267

## 268 Conclusions

269

270 Participation in our survey was relatively low, with only 16.6% of the sample responding. The lack of  
271 engagement from key IPCC scientists, who are responsible for preparing the institution's most widely read  
272 reports, aligns with findings from previous studies highlighting the difficulty that the average reader has in  
273 comprehending these reports (Dormer, 2020; Jos Delbeke et al., 2019).

274 One lead author of IPCC AR6 WGII declined to participate in the survey because it did not allow the option to  
275 leave questions blank or to skip options, they felt were insufficiently detailed. Another scientist, a vice-chair of  
276 the IPCC AR6, completed the survey but expressed, both in the open-response section and via email, their  
277 disagreement with several concepts and requested that some of his responses be disregarded.

Eliminado: ¶

278 The disparity in participant behavior in our survey is evident: while some respondents scored highly on  
279 questions involving concepts such as journalistic language, religion, or politics, others either refused to  
280 participate or expressed dissatisfaction with the inclusion of these topics. This highlights the need for a revised  
281 communication strategy that addresses these concerns and enhances the impact of the IPCC report content  
282 (Anseel et al., 2010; Bhandari, 2022; Solecki et al., 2024).

283 Trust in the source of information is crucial for that information to influence decision-making. This relationship  
284 between trust and decision-making has been extensively studied in medicine, particularly in managing the  
285 delivery of "bad news" and the need for patients to make significant decisions. Informed decision-making is  
286 now a well-established practice in medical fields (Chandra et al., 2018; Musmade et al., 2013).

287 Information about climate change often represents "bad news" for much of society, requiring careful  
288 communication and informed decision-making. Trust in the source of climate information is just as essential as  
289 it is in medicine. Similar to medical contexts, recipients of climate information often lack the full capacity to  
290 understand highly technical or scientific content, especially during times of emotional stress. Therefore, this  
291 information needs to be adapted to the audience's level of understanding. The scientists' responses in our survey,  
292 which emphasize the need for empathy and a solutions-based approach, reflect this mindset. While the diagnosis  
293 and proposed solutions must come from science, their implementation requires clear communication to society,  
294 which must ultimately make the final decision—ideally, with widespread social consensus (Goldberg et al.,  
295 2020).

296 The open-ended responses to our survey also highlight the critical role of trust in the information source  
297 (Goodwin & Dahlstrom, 2014). National Meteorological Services serve as key guarantors of the accuracy and  
298 reliability of past climate data, which underpins their credibility when comparing past and present data to  
299 confirm that climate change is occurring. They also play a vital role in explaining the new climate realities to  
300 society, allowing people to comprehend and contextualize the future climatology they will face (Molina &  
301 Abadal, 2024).

303 Communication is a broad concept that encompasses the sender, the receiver, and the message. However, it also  
304 involves the action (or inaction) of communicating, beyond the mere intentions of those sending and receiving  
305 information (Charles Bazerman, 2019; Luhmann, 1992). In the case of climate change, where the active  
306 participation of the public is crucial, a proliferation of diverse and engaging narratives around the topic is  
307 necessary to inspire action and understanding.

308 These narratives must be tailored to the diverse cultures, beliefs, and values of different human communities  
309 worldwide, offering a moral framework that is acceptable to all (Hulme, 2009). Climate change communication  
310 involves many stakeholders with varying levels of expertise and perspectives, yet all rely on the scientific  
311 foundation of climate knowledge. How this knowledge reaches and resonates with society is crucial, and the  
312 process of popularizing it should involve the scientists who created it. Developing a methodology within the  
313 IPCC itself to produce texts written in clear, accessible language—akin to journalistic style (Smith & Higgins,  
314 2020)—could help reduce the contradictory and confusing headlines that often reach the public. Some IPCC  
315 scientists who responded to our survey suggested that this could be an innovation for future cycles, proposing  
316 ideas such as creating a summary text for the general public, approved by scientists rather than governments, to  
317 eliminate concerns about politicization and preserve trust in both the message and its source.

318 The role of the media and social networks in interpreting and delivering IPCC information to the public is vital,  
319 as reflected in the opinions of our respondents. Media coverage and social media discussions shape public  
320 opinion on climate change (Pearce et al., 2019; Sarathchandra & Haltinner, 2023). The media's portrayal of the  
321 Conferences of the Parties (COP), where decision-makers, government representatives, and non-governmental  
322 organizations gather, also influences societal perceptions of climate action and the acceptance of measures to  
323 mitigate climate change, whether current or forthcoming (Sisco et al., 2021).

324 In recent years, significant research has explored the role of emotions, empathy, and affect (Brosch, 2021) in  
325 climate change communication, aiming to inspire societal action. However, the gap between climate scientists  
326 and the delivery of their findings to the global public remains unresolved. More efforts are needed to create  
327 content that can be directly communicated to society without the often inaccurate interpretations introduced by  
328 intermediaries who currently serve as the public's source of climate information.

329

### 330 **References**

331

332 Adler, C. E., & Hirsch Hadorn, G. (2014). The IPCC and treatment of uncertainties: topics and sources of  
333 dissensus. *WIREs Climate Change*, 5(5), 663–676. <https://doi.org/10.1002/wcc.297>

334 Anseel, F., Lievens, F., Schollaert, E., & Choragwicka, B. (2010). Response Rates in Organizational Science,  
335 1995–2008: A Meta-analytic Review and Guidelines for Survey Researchers. *Journal of Business and*  
336 *Psychology*, 25(3), 335–349. <https://doi.org/10.1007/s10869-010-9157-6>

337 Beck, S. (2012). Between Tribalism and Trust: The IPCC Under the &quot;Public Microscope&quot;  
338 *Nature and Culture*, 7(2), 151–173. <https://doi.org/10.3167/nc.2012.070203>

339 Beck, S., & Mahony, M. (2018a). The IPCC and the new map of science and politics. *WIREs Climate Change*,  
340 9(6). <https://doi.org/10.1002/wcc.547>

341 Beck, S., & Mahony, M. (2018b). The IPCC and the new map of science and politics. *WIREs Climate Change*,  
342 9(6). <https://doi.org/10.1002/wcc.547>

343 Bhandari, M. P. (2022). *Getting the Climate Science Facts Right*. River Publishers.  
344 <https://doi.org/10.1201/9781003338291>

345 Bolisani, E., & Bratianu, C. (2018). The Elusive Definition of Knowledge. In *Knowledge Management and*  
346 *Organizational Learning* (pp. 1–22). [https://doi.org/10.1007/978-3-319-60657-6\\_1](https://doi.org/10.1007/978-3-319-60657-6_1)

347 Brosch, T. (2021). Affect and emotions as drivers of climate change perception and action: a review. *Current*  
348 *Opinion in Behavioral Sciences*, 42, 15–21. <https://doi.org/10.1016/j.cobeha.2021.02.001>

349 Buttel, F. H., Hawkins, A. P., & Power, A. G. (1990). From limits to growth to global change. *Global*  
350 *Environmental Change*, 1(1), 57–66. [https://doi.org/10.1016/0959-3780\(90\)90007-V](https://doi.org/10.1016/0959-3780(90)90007-V)

351 Chandra, S., Mohammadnezhad, M., & Ward, P. (2018). Trust and Communication in a Doctor- Patient  
352 Relationship: A Literature Review. *Journal of Healthcare Communications*, 03(03).  
353 <https://doi.org/10.4172/2472-1654.100146>

354 Change, G. E. (2011). The elephant in the room: Capitalism and global environmental change. *Global*  
355 *Environmental Change*, 21, 4–6.

356 Charles Bazerman. (2019). Scientific writing as a social act: A review of the literature of the sociology of  
357 science. In *New Essays in Technical and Scientific Communication* (pp. 156–184). Routledge.

358 Cutter, S., Osman-Elasha, B., Campbell, J., Cheong, S. M., McCormick, S., Pulwarty, R., Supratid, S.,  
359 Ziervogel, G., Calvo, E., Mutabazi, K., & Arnall, A. (2012). *Managing the risks from climate extremes at the*  
360 *local level* (Special Report of the Intergovernmental Panel on Climate Change, Ed.). Cambridge University  
361 Press.

362 De Pryck, K. (2018). *Expertise under controversy: the case of the Intergovernmental Panel on Climate Change*  
363 *(IPCC)*. Diss. Paris, Institut d'études politiques.

364 Doran, R., Ogunbode, C. A., Böhm, G., & Gregersen, T. (2023). Exposure to and learning from the IPCC  
365 special report on 1.5 °C global warming, and public support for climate protests and mitigation policies. *Npj*  
366 *Climate Action*, 2(1), 11. <https://doi.org/10.1038/s44168-023-00042-9>

367 Dormer, R. (2020). Linguistic analysis and climate change discourse: Exploring current linguistic perspectives.  
368 *Proceedings of the International Conference on Sociolinguistics and Language Sciences*.  
369 [file:///C:/Users/Usuario/Downloads/Linguistic\\_Analysis\\_and\\_Climate\\_Change\\_Discourse\\_Exploring\\_C%20\(4\)](file:///C:/Users/Usuario/Downloads/Linguistic_Analysis_and_Climate_Change_Discourse_Exploring_C%20(4).pdf)  
370 .pdf

371 Francisco, P. (2015). *Laudato Si': Sobre el cuidado de la casa común*. San Pablo.

372 Fuhrer, J., Beniston, M., Fischlin, A., Frei, Ch., Goyette, S., Jasper, K., & Pfister, Ch. (n.d.). Climate risks and  
373 their impact on agriculture and forests in Switzerland. In *Climate Variability, Predictability and Climate Risks*  
374 (pp. 79–102). Springer Netherlands. [https://doi.org/10.1007/978-1-4020-5714-4\\_5](https://doi.org/10.1007/978-1-4020-5714-4_5)

375 Gay-Antaki, M. (2021). Stories from the IPCC: An essay on climate science in fourteen questions. *Global*  
376 *Environmental Change*, 71, 102384. <https://doi.org/10.1016/j.gloenvcha.2021.102384>

377 Gameda, D. O., Korecha, D., & Garedew, W. (2023). Climate Change Perception and Vulnerability Assessment  
378 of the Farming Communities in the Southwest Parts of Ethiopia. *Climate*, 11(9), 183.  
379 <https://doi.org/10.3390/cli11090183>

380 Goldberg, M. H., van der Linden, S., Leiserowitz, A., & Maibach, E. (2020). Perceived Social Consensus Can  
381 Reduce Ideological Biases on Climate Change. *Environment and Behavior*, 52(5), 495–517.  
382 <https://doi.org/10.1177/0013916519853302>

383 Goodwin, J., & Dahlstrom, M. F. (2014). Communication strategies for earning trust in climate change debates.  
384 *WIREs Climate Change*, 5(1), 151–160. <https://doi.org/10.1002/wcc.262>

385 Hansen, J., Sato, M., Kharecha, P., Beerling, D., Berner, R., Masson-Delmotte, V., Pagani, M., Raymo, M.,  
386 Royer, D. L., & Zachos, J. C. (2008). Target Atmospheric CO<sub>2</sub>: Where Should Humanity Aim? *The Open*  
387 *Atmospheric Science Journal*, 2(1), 217–231. <https://doi.org/10.2174/1874282300802010217>

388 Harold, J., Lorenzoni, I., Shipley, T. F., & Coventry, K. R. (2020). Communication of IPCC visuals: IPCC  
389 authors' views and assessments of visual complexity. *Climatic Change*, 158(2), 255–270.  
390 <https://doi.org/10.1007/s10584-019-02537-z>

391 Hermansen, E. A. T., Lahn, B., Sundqvist, G., & Øye, E. (2021). Post-Paris policy relevance: lessons from the  
392 IPCC SR15 process. *Climatic Change*, 169(1–2), 7. <https://doi.org/10.1007/s10584-021-03210-0>

393 Höhne, N., Gidden, M. J., den Elzen, M., Hans, F., Fyson, C., Geiges, A., Jeffery, M. L., Gonzales-Zuñiga, S.,  
394 Mooldijk, S., Hare, W., & Rogelj, J. (2021). Wave of net zero emission targets opens window to meeting the  
395 Paris Agreement. *Nature Climate Change*, 11(10), 820–822. <https://doi.org/10.1038/s41558-021-01142-2>

396 Hollin, G. J. S.,

397 **No hay ninguna fuente en el documento actual.** Pearce, W. (2015). Tension between scientific certainty and  
398 meaning complicates communication of IPCC reports. *Nature Climate Change*, 5(8), 753–756.  
399 <https://doi.org/10.1038/nclimate2672>

400 Howes, R., Skea, J., & Whelan, B. (2013). *Clean and Competitive*. Routledge.  
401 <https://doi.org/10.4324/9781315071114>

402 Hulme, M. (2009). *Why We Disagree about Climate Change*. Cambridge University Press.  
403 <https://doi.org/10.1017/CBO9780511841200>

404 IPCC. (n.d.). *IPCC Board*. Retrieved September 14, 2023, from  
405 <https://archive.ipcc.ch/nominations/results.shtml>

406 Jos Delbeke, A. R.-M., Yvon Slingenberg, & Jake Werksman. (2019). The Paris Agreement. In *Towards a*  
407 *Climate-Neutral Europe* (Routledge).

408 Leiserowitz, A., Roser-Renouf, C., Marlon, J., & Maibach, E. (2021). Global Warming's Six Americas: a  
409 review and recommendations for climate change communication. *Current Opinion in Behavioral Sciences*, 42,  
410 97–103. <https://doi.org/10.1016/j.cobeha.2021.04.007>

411 Lewandowsky, S. (2021). Climate Change Disinformation and How to Combat It. *Annual Review of Public*  
412 *Health*, 42(1), 1–21. <https://doi.org/10.1146/annurev-publhealth-090419-102409>

413 Liverman, D., vonHedemann, N., Nying'uro, P., Rummukainen, M., Stendahl, K., Gay-Antaki, M., Craig, M.,  
414 Aguilar, L., Bynoe, P., Call, F., Connors, S., David, L., Ferrone, A., Hayward, B., Jayawardena, S., Mai Touray,  
415 L., Parikh, J., Pathak, M., Perez, R., ... Wagle, R. (2022). Survey of gender bias in the IPCC. *Nature*,  
416 602(7895), 30–32. <https://doi.org/10.1038/d41586-022-00208-1>

417 Luhmann, N. (1992). What is Communication? *Communication Theory*, 2(3), 251–259.  
418 <https://doi.org/10.1111/j.1468-2885.1992.tb00042.x>

419 Lynn, J. (2018). *Communicating the IPCC: Challenges and Opportunities* (pp. 131–143).  
420 [https://doi.org/10.1007/978-3-319-70479-1\\_8](https://doi.org/10.1007/978-3-319-70479-1_8)

421 McBeth, M. K., Lybecker, D. L., & Sargent, J. M. (2022). NARRATIVE EMPATHY. *World Affairs*, 185(3),  
422 471–499. <https://doi.org/10.1177/00438200221107018>

423 Molina, T., & Abadal, E. (2021). The evolution of communicating the uncertainty of climate change to  
424 policymakers: A study of ipcc synthesis reports. *Sustainability (Switzerland)*, 13(5).  
425 <https://doi.org/10.3390/su13052466>

426 Molina, T., & Abadal, E. (2024). Enhancing strategies and actions to elevate public awareness and optimize  
427 decision-making. *EMS Annual Meeting*. <https://doi.org/https://doi.org/10.5194/ems2024-211>

428 Molina, T., & Abadal, E. (2024). Exploring the role of national weather services in climate change knowledge  
429 and communication: an international survey. *Discover Atmosphere*, 2(1), 16. [https://doi.org/10.1007/s44292-](https://doi.org/10.1007/s44292-024-00019-1)  
430 [024-00019-1](https://doi.org/10.1007/s44292-024-00019-1)

431 Musmade, P., Nijhawan, L., Udupa, N., Bairy, K., Bhat, K., Janodia, M., & Muddukrishna, B. (2013). Informed  
432 consent: Issues and challenges. *Journal of Advanced Pharmaceutical Technology & Research*, 4(3), 134.  
433 <https://doi.org/10.4103/2231-4040.116779>

434 Newman, T. P. (2017). Tracking the release of IPCC AR5 on Twitter: Users, comments, and sources following  
435 the release of the Working Group I Summary for Policymakers. *Public Understanding of Science*, 26(7), 815–  
436 825. <https://doi.org/10.1177/0963662516628477>

Código de campo cambiado

- 437 Pearce, W., Niederer, S., Özkula, S. M., & Sánchez Querubín, N. (2019). The social media life of climate  
438 change: Platforms, publics, and future imaginaries. *WIREs Climate Change*, 10(2).  
439 <https://doi.org/10.1002/wcc.569>
- 440 Pidcock, R., Heath, K., Messling, L., Wang, S., Pirani, A., Connors, S., Corner, A., Shaw, C., & Gomis, M.  
441 (2021). Evaluating effective public engagement: local stories from a global network of IPCC scientists. *Climatic  
442 Change*, 168(3–4), 21. <https://doi.org/10.1007/s10584-021-03230-w>
- 443 Ripple, W. J., Wolf, C., Gregg, J. W., Levin, K., Rockström, J., Newsome, T. M., Betts, M. G., Huq, S., Law, B.  
444 E., Kemp, L., Kalmus, P., & Lenton, T. M. (2022). World Scientists' Warning of a Climate Emergency 2022.  
445 *BioScience*, 72(12), 1149–1155. <https://doi.org/10.1093/biosci/biac083>
- 446 Rödder, S., & Pavenstädt, C. N. (2023). 'Unite behind the Science!' Climate movements' use of scientific  
447 evidence in narratives on socio-ecological futures. *Science and Public Policy*, 50(1), 30–41.  
448 <https://doi.org/10.1093/scipol/scac046>
- 449 Sanford, M., Painter, J., Yasseri, T., & Lorimer, J. (2021). Controversy around climate change reports: a case  
450 study of Twitter responses to the 2019 IPCC report on land. *Climatic Change*, 167(3–4), 59.  
451 <https://doi.org/10.1007/s10584-021-03182-1>
- 452 Sarathchandra, D., & Haltinner, K. (2023). How Media, Information Sources, and Trust Shape Climate Change  
453 Denial or Doubt. *Social Currents*, 232949652311687. <https://doi.org/10.1177/23294965231168785>
- 454 Sisco, M. R., Pianta, S., Weber, E. U., & Bosetti, V. (2021). Global climate marches sharply raise attention to  
455 climate change: Analysis of climate search behavior in 46 countries. *Journal of Environmental Psychology*, 75,  
456 101596. <https://doi.org/10.1016/j.jenvp.2021.101596>
- 457 Smith, A., & Higgins, M. (2020). *The language of journalism: A multi-genre perspective*. Bloomsbury  
458 Publishing USA.
- 459 Solecki, W., Roberts, D., & Seto, K. C. (2024). Strategies to improve the impact of the IPCC Special Report on  
460 Climate Change and Cities. *Nature Climate Change*, 14(7), 685–691. <https://doi.org/10.1038/s41558-024-024-02060-9>
- 462 Somerville, R. C. J., & Hassol, S. J. (2011). Communicating the science of climate change. *Physics Today*,  
463 64(10), 48–53. <https://doi.org/10.1063/PT.3.1296>
- 464 Stocker, T. F., & Plattner, G.-K. (2016). Making use of the IPCC's powerful communication tool. *Nature  
465 Climate Change*, 6(7), 637–638. <https://doi.org/10.1038/nclimate3010>
- 466 Wachholz, S., Artz, N., & Chene, D. (2014). Warming to the idea: university students' knowledge and attitudes  
467 about climate change. *International Journal of Sustainability in Higher Education*, 15(2), 128–141.  
468 <https://doi.org/10.1108/IJSHE-03-2012-0025>
- 469
- 470 Author Note

471  
472 + Tomas Molina, MSc (corresponding author)  
473 Universitat de Barcelona  
474 ORCID 0000-0001-8127-6401  
475 Facultat de Física  
476 Departament física aplicada  
477 Martí Franquès 1-11  
478 08028 Barcelona  
479 Spain  
480 +34 629741334  
481 [tomasmolinabosch@ub.edu](mailto:tomasmolinabosch@ub.edu)  
482 Tomas Molina  
483 Physicist and Journalist, now involved in his PhD in communication of Climate Change.  
484 Chief Meteorologist of Televisió de Catalunya, where he has been presenting the weather information since  
485 1987.  
486 Associate Professor since 2000 at the University of Barcelona teaches the subjects of Analysis and  
487 Meteorological Forecast, and Meteorology and the Media.  
488 He is a member of the Board of Directors of the Meteorological Service of Catalonia, European Climate Pact  
489 Ambassador, and member of the Board of Directors of the International Association of Broadcast Meteorology,  
490 IABM, former chairman for 5 years. IABM has Observer status in the World Meteorological Organization.  
491 In the past, he has also been the President of the Catalan Council for Scientific Communication C4, a member of  
492 the Advisory Council of the Parliament in Science and Technology, CAPCIT and director of environmental  
493 information programs such as “Espai Terra”, and others.  
494 He has been Reviewer of the Synthesis report of the 5th and 6<sup>th</sup> IPCC reports.  
495 He has written several books on Climate Change such as “The year my grandfather saw it rain”, “You, me and  
496 the environment” and several children's story books.  
497  
498  
499 + Ernest Abadal, Full professor  
500 Universitat de Barcelona  
501 ORCID 0000-0002-9151-6437  
502 Facultat d'Informació i Mitjans Audiovisuals  
503 Melcior de Palau 140  
504 08014 Barcelona  
505 Spain  
506 +34 681303048  
507 [abadal@ub.edu](mailto:abadal@ub.edu)  
508 Ernest Abadal

Código de campo cambiado

509 Professor at the Faculty of Information and Audiovisual Media at the University of Barcelona. Degree in  
510 Philosophy, diploma in Librarianship and Documentation and doctorate in Information Sciences.

511 My area of teaching is technologies applied to documentation and, in a special way, digital publications.  
512 Principal researcher of several projects of the State R+D+I Plan dedicated to open access and open science in  
513 Spain. I have also coordinated the Consolidated Research Group "Culture and digital contents", recognized by  
514 the Generalitat de Catalunya.

515 I have written several books and numerous articles on document technologies, scientific publishing, science  
516 communication and open science. (More details at: <https://fima.ub.edu/pub/abadal/>)

517 Member of the advisory board of "El professional de la información", "AIB Studi", "Hipertext.net" and  
518 reviewer of several scientific journals in my specialty.

519 I am currently Vice-Chancellor Assistant to the Rector and of Teaching and Research Staff at the University of  
520 Barcelona. Previously, I was dean of the Faculty of Librarianship and Documentation (current Faculty of  
521 Information and Audiovisual Media) (2012-18) of the University of Barcelona, director of the Center for  
522 Research in Information, Communication and Culture, head of studies of the degree in Librarianship and  
523 Documentation, head of studies for the degree in Documentation, director of the Department of Librarianship  
524 and Documentation, coordinator of the doctoral program, Deputy for Information and Documentation Systems  
525 at the Vice-Rectorate for Teaching Policy of the University of Barcelona (2005-08) and vice-president of the  
526 Consortium of University Libraries of Catalonia (2005-08).

527 I have collaborated with assessment agencies in Catalonia (AQU, AGAUR), Spain (AEI, ANEP, ANECA,  
528 ACSUCYL), Italy (ANVUR) and Greece (HQA).

529

530

531

532 **-Ethics Approval**  
533 There are no conflicts of interest among the authors, and no external funding was involved in this research. [All](#)  
534 [participants were fully informed about the purpose of the study and provided their consent to participate in the](#)  
535 [survey.](#)

536

537 **-Consent for publication**  
538 All authors consent to participate.

539

540 **-Competing Interests**  
541 The authors have no relevant financial or non-financial interests to disclose.

542

543 **-Author contributions (Please ensure that all authors are individually mentioned in the**  
544 **author contribution statement.)**  
545 TM, EA design, conceptualization  
546 TM, EA data acquisition  
547 TM, EA analysis and data interpretation  
548 TM Article Writing  
549 TM, EA article review  
550 All authors read and approved the final manuscript.

551

**Eliminado:** All participants were fully informed about the purpose of the study and provided their consent to participate in the survey.



555 **-Funding**

556 The authors declare that no funds, grants, or other support were received during the  
557 preparation of this manuscript.

558

559 **-Availability of data and materials**

560 Survey and survey results included in Supplementary Materials

561
